# Supplementary material
Source: publisher figshare collection journal article supplement (https://acs.figshare.com/ndownloader/files/24363975)
Supplement: Supplementary file 1 [file 24363975]

## *Supporting Information*

# **Crystallization-Induced Planer Chirality by Asymmetric Ferrocene-Appended Tetraazanaphthacene**

Kyosuke Isoda,<sup>a\*</sup> Harufumi Haga,<sup>b</sup> Hajime Kamebuchi,<sup>c\*</sup> Makoto Tadokoro<sup>b\*</sup>

*<sup>a</sup>Faculty of Engineering and Design, Kagawa University, 2217-20 Hayashi-cho, Takamatsu, Kagawa 761-0396, Japan; Health Research Institute, National Institute of Advanced Industrial Science and Technology (AIST), 2217-14 Hayashi-cho, Takamatsu, Kagawa 761-0395, Japan*

E-mail isoda.kyosuke@kagawa-u.ac.jp

*<sup>b</sup>Department of Chemistry, Faculty of Science, Tokyo University of Science, 1-3 Kagurazaka, Shinjuku-ku, Tokyo 162-8601, Japan*

E-mail tadokoro@rs.kagu.tus.ac.jp

*<sup>c</sup>Department of Chemistry, College of Humanities and Sciences, Nihon University, Sakurajosui 3-25-40, Setagaya-ku, Tokyo 156-8550, Japan*

E-mail hkame@chs.nihon-u.ac.jp

## ***General Methods***

$^1\text{H}$  and  $^{13}\text{C}$  NMR spectra were recorded on a JEOL JNM-LA300 spectrometer. Chemical shift of  $^1\text{H}$  and  $^{13}\text{C}$  NMR signals were quoted to tetramethylsilane ( $\delta = 0.00$ ) and ( $\delta = 77.00$ ) as internal standards, respectively. IR spectra were measured with a HORIBA FREEXACT-II spectrometer. MALDI-TOF mass spectra were collected on a JEOL JMS-S3000 by using dithranol as matrix. Elemental analyses were carried out with Perkin-Elmer instruments Series II CHNS/O Analyzer 2400. Cyclic voltammetry (CV) was carried out in  $\text{CH}_3\text{CN}$  solution of  $\text{Bu}_4\text{NPF}_4$  (0.10 M) with glassy carbon working, Pt counter, and an  $\text{Ag}/\text{Ag}^+$  reference electrode using an ALS CHI 600B electrochemical analyzer. All potentials were calibrated with  $\text{Fc}/\text{Fc}^+$  couple using ferrocene as an internal reference. UV/Vis absorption spectra were measured with a JASCO V-550 UV-*vis* Spectrophotometer spectrometer. The density functional theory (DFT) calculations were carried out using Wavefunction SPARTAN'16 programs. The ground-state geometries were optimized at the B3LYP/6-31G\* level of theory.<sup>1</sup> The X-ray data collection for **FcTANC** was performed with a Bruker SMART APEX II CCD X-ray diffractometer using Lorenz-polarization corrections and multilayered confocal mirror  $\text{MoK}\alpha$  ( $\lambda = 0.71070 \text{ \AA}$ ). Data set was processed using APEX2 suite software package (Bruker AXS, Madison USA). These structures of **FcTANC** were solved by direct methods with SHELXS-97<sup>2</sup> or intrinsic phasing with SHELXT 2014/5.<sup>3</sup> The hydrogen-atom positions were geometrically calculated and refined using riding model. All reagents and solvents were purchased from Aldrich, Tokyo Kasei, Kanto Chemical, or Wako, and used as received.

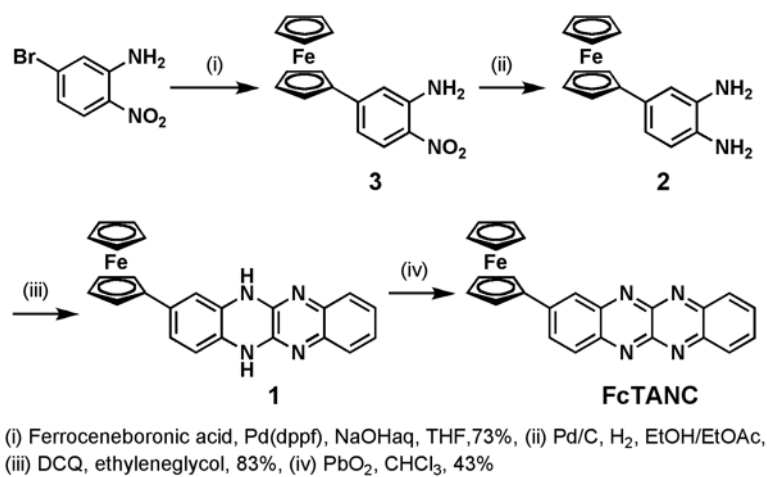

Scheme S1. The synthesis route of **FcTANC**.

#### 4-Ferrocenyl-2-nitroaniline (**3**)

The solution of 1-bromo-4-nitro-aniline (1.10 g, 5.00 mmol), ferroceneboronic acid (1.62 g, 7.50 mmol), Pd(dppf)Cl<sub>2</sub> (0.25 g, 0.50 mmol), and NaOHaq (1.0 M, 20 cm<sup>3</sup>) in dry THF (20 cm<sup>3</sup>) was stirred at 80 °C for 72 h. After cooling to room temperature, the reaction mixture was filtrated with the Celite and THF was evaporated. The reaction mixture was extracted with CHCl<sub>3</sub> three times. The combined organic layers were washed with brine, and dried over anhydrous Na<sub>2</sub>SO<sub>4</sub>. After filtration and evaporation, the crude product was purified by column chromatography (silica, CHCl<sub>3</sub>), recrystallized with EtOAc / Hexane, and dried under vacuum to afford the product as a black solid (1.2 g, 73%). <sup>1</sup>H NMR (300 MHz, CDCl<sub>3</sub>): δ 8.18 (s, 1H, Ar<sup>1</sup>H), 7.52 (d, *J* = 4.35 Hz 1H, Ar<sup>3</sup>H), 6.77 (d, *J* = 4.35 Hz 1H, Ar<sup>2</sup>H), 6.05 (s, 2H, NH<sub>2</sub>), 4.59 (s, 2H, Fc), 4.31 (s, 2H, Fc), 4.05 (s, 5H, Fc) ppm; <sup>13</sup>C NMR (75 MHz, CDCl<sub>3</sub>): δ 148.17, 147.85, 177.49, 147.10, 146.53, 144.70, 143.63, 133.25, 132.66, 132.14, 130.38, 130.16, 129.59, 122.10, 82.40, 71.81, 70.34, 67.82 ppm; IR (KBr): 3629, 3594, 3523, 3448, 3323, 2853, 2380, 2175, 1635, 1599, 1560, 1522, 1473, 1414, 1346, 1315, 1290, 1228, 1201, 1173, 1099, 999, 922, 887, 814, 766, 710, 652, 625, 548 cm<sup>-1</sup>; MS(MALDI-TOF): *m/z* = 322.1 [M]<sup>+</sup>; elemental analysis: calcd (%) for CHNO: C59.65, H 4.38, N17.34; found: C 59.67, H 4.17, N 8.81.

#### 2-Ferrocenyl-5,11-dihydro-5,6,11,12-tetraazanaphthacene (**1**)

The suspension of **3** (0.97 g, 3.00 mmol), Pd/C (0.10 g) in dried EtOH/EtOAc (40 cm<sup>3</sup> / 40 cm<sup>3</sup>) was vigorously stirred under H<sub>2</sub> atmosphere at room temperature overnight. The reaction solution was filtrated with Celite under Ar atmosphere, and evaporated to give 4-ferrocenyl-

1,2-diaminobenzene. Next, the solution of 4-ferrocenyl-1,2-diaminobenzene and 2,3-Dichloroquinoxaline (DCQ) (0.60 g, 3.00 mmol) in ethylene glycol (60 cm<sup>3</sup>) was heated for 10 min. After cooling to room temperature, the reaction mixture was poured into water, then filtrated, dried under vacuum to afford the reaction mixture as a yellow solid (1.00 g, 83%). The work up is done without purification because of insolubility in organic solvent. MS(MALDI-TOF):  $m/z = 418.1$  [M]<sup>+</sup>.

## 2-Ferrocenyl-5,6,11,12-tetraazanaphthacene (FcTANC)

To a suspension of **2** (0.11 g, 0.26 mmol) and PbO<sub>2</sub> (1.65 g, 6.9 mmol) in CHCl<sub>3</sub> (100 cm<sup>3</sup>) was vigorously stirred and refluxed for 24 h. After cooling to room temperature, the reaction mixture was filtrated, evaporated, then purified by column chromatography (silica, CHCl<sub>3</sub>/MeOH = 97:3, v/v), and dried under vacuum to afford the product as a black solid (0.047 g, 43%). <sup>1</sup>H NMR (300 MHz, CDCl<sub>3</sub>): δ 8.39 (*m*, 2H, Ar<sup>8</sup>H), 8.31 (*dd*, *J* = 9.3, 0.6 Hz, 1H, Ar<sup>4</sup>H), 8.30 (*dd*, *J* = 2.1, 0.6 Hz, 1H, Ar<sup>1</sup>H), 8.07 (*dd*, *J* = 9.3, 2.1 Hz, 1H, Ar<sup>3</sup>H), 7.95 (*m*, 2H, Ar<sup>7</sup>H), 4.97 (*t*, *J* = 1.8 Hz, 2H, Fc), 4.67 (*t*, *J* = 1.8 Hz, 2H, Fc), 4.16 (*s*, 5H, Fc) ppm; <sup>13</sup>C NMR (75 MHz, CDCl<sub>3</sub>): δ 142.88, 134.03, 132.38, 128.76, 122.08, 118.89, 83.93, 69.53, 68.96, 65.98 ppm; IR (KBr): 1618, 1541, 1522, 1477, 1454, 1431, 1398, 1377, 1325, 1261, 1107, 1074, 1003, 958, 928, 903, 876, 835, 818, 758, 741, 714, 669, 619, 594, 575, 550, 513 cm<sup>-1</sup>; elemental analysis: calcd (%) for CHNO: C 69.25, H 3.87, N 13.46; found: C 69.71, H 3.53, N 13.83.

**Table S1.** Crystal data and structure refinement for **Crystal I** and **Crystal II**.

| Identification<br>code (file name)                     | <b>Crystal IS</b><br>(FerroceneTANC3_100.cif)                                                                            | <b>Crystal IR</b><br>(FerroceneTANC3_rt_0m_a.cif)                                                                     | <b>Crystal II</b><br>(FerroceneTANC6_0m_a.cif)                                                                                     |
|--------------------------------------------------------|--------------------------------------------------------------------------------------------------------------------------|-----------------------------------------------------------------------------------------------------------------------|------------------------------------------------------------------------------------------------------------------------------------|
| CCDC                                                   | 1995985                                                                                                                  | 2011490                                                                                                               | 942335                                                                                                                             |
| Empirical<br>formula                                   | C <sub>24</sub> H <sub>16</sub> Fe N <sub>4</sub>                                                                        | C <sub>24</sub> H <sub>16</sub> Fe N <sub>4</sub>                                                                     | C <sub>24</sub> H <sub>16</sub> Fe N <sub>4</sub>                                                                                  |
| Formula weight                                         | 416.26                                                                                                                   | 416.26                                                                                                                | 416.26                                                                                                                             |
| Temperature                                            | 173(2) K                                                                                                                 | 296(2) K                                                                                                              | 173(2) K                                                                                                                           |
| Wavelength                                             | 0.71073 Å                                                                                                                | 0.71073 Å                                                                                                             | 0.71073 Å                                                                                                                          |
| Crystal system                                         | <i>Tetragonal</i>                                                                                                        | <i>Tetragonal</i>                                                                                                     | <i>Monoclinic</i>                                                                                                                  |
| Space group                                            | <i>P</i> 4 <sub>3</sub> 2 <sub>1</sub> 2                                                                                 | <i>P</i> 4 <sub>1</sub> 2 <sub>1</sub> 2                                                                              | <i>P</i> 2 <sub>1</sub> /n                                                                                                         |
| Unit cell<br>dimensions                                | <i>a</i> = 8.8893(13) Å $\alpha$ = 90°<br><i>b</i> = 8.8893(13) Å $\beta$ = 90°<br><i>c</i> = 45.353(7) Å $\gamma$ = 90° | <i>a</i> = 8.906(3) Å $\alpha$ = 90°<br><i>b</i> = 8.906(3) Å $\beta$ = 90°<br><i>c</i> = 46.052(16) Å $\gamma$ = 90° | <i>a</i> = 16.111(9) Å $\alpha$ = 90°<br><i>b</i> = 10.377(6) Å<br>$\beta$ = 108.259(8)°<br><i>c</i> = 22.481(13) Å $\gamma$ = 90° |
| Volume                                                 | 3583.8(12) Å <sup>3</sup>                                                                                                | 3653(3) Å <sup>3</sup>                                                                                                | 3569(4) Å <sup>3</sup>                                                                                                             |
| <i>Z</i>                                               | 8                                                                                                                        | 8                                                                                                                     | 8                                                                                                                                  |
| Density<br>(calculated)                                | 1.543 Mg/m <sup>3</sup>                                                                                                  | 1.514 Mg/m <sup>3</sup>                                                                                               | 1.549 Mg/m <sup>3</sup>                                                                                                            |
| Absorption<br>coefficient                              | 0.860 mm <sup>-1</sup>                                                                                                   | 0.844 mm <sup>-1</sup>                                                                                                | 0.864 mm <sup>-1</sup>                                                                                                             |
| <i>F</i> (000)                                         | 1712                                                                                                                     | 1712                                                                                                                  | 1712                                                                                                                               |
| Crystal size                                           | 0.150 x 0.100 x 0.040 mm <sup>3</sup>                                                                                    | 0.103 x 0.098 x 0.097 mm <sup>3</sup>                                                                                 | 0.080 x 0.080 x 0.010 mm <sup>3</sup>                                                                                              |
| Theta range for<br>data collection                     | 2.335 to 27.103°                                                                                                         | 1.769 to 25.027°                                                                                                      | 1.865 to 27.484°                                                                                                                   |
| Index ranges                                           | -11 ≤ <i>h</i> ≤ 11, -11 ≤ <i>k</i> ≤ 6, -<br>55 ≤ <i>l</i> ≤ 58                                                         | -6 ≤ <i>h</i> ≤ 10, -10 ≤ <i>k</i> ≤ 10, -<br>54 ≤ <i>l</i> ≤ 49                                                      | -19 ≤ <i>h</i> ≤ 20, -13 ≤ <i>k</i> ≤ 12, -<br>29 ≤ <i>l</i> ≤ 21                                                                  |
| Reflections<br>collected                               | 19585                                                                                                                    | 17400                                                                                                                 | 19607                                                                                                                              |
| Independent<br>reflections                             | 3964 [R(int) = 0.0762]                                                                                                   | 3237 [R(int) = 0.0421]                                                                                                | 8133 [R(int) = 0.0637]                                                                                                             |
| Completeness to<br>theta = 25.242°                     | 100.0%                                                                                                                   | 100.0 %                                                                                                               | 99.9%                                                                                                                              |
| Data / restraints /<br>parameters                      | 3964 / 0 / 262                                                                                                           | 3237 / 0 / 262                                                                                                        | 8133 / 0 / 523                                                                                                                     |
| Goodness-of-fit<br>on <i>F</i> <sup>2</sup>            | 0.963                                                                                                                    | 1.049                                                                                                                 | 0.963                                                                                                                              |
| Final <i>R</i> indices [ <i>I</i><br>> 2σ( <i>I</i> )] | <i>R</i> <sub>1</sub> = 0.0358, <i>wR</i> <sub>2</sub> = 0.0680                                                          | <i>R</i> <sub>1</sub> = 0.0361, <i>wR</i> <sub>2</sub> = 0.0768                                                       | <i>R</i> <sub>1</sub> = 0.0517, <i>wR</i> <sub>2</sub> = 0.0973                                                                    |
| <i>R</i> indices (all<br>data)                         | <i>R</i> <sub>1</sub> = 0.0461, <i>wR</i> <sub>2</sub> = 0.0706                                                          | <i>R</i> <sub>1</sub> = 0.0465, <i>wR</i> <sub>2</sub> = 0.0819                                                       | <i>R</i> <sub>1</sub> = 0.1136, <i>wR</i> <sub>2</sub> = 0.1173                                                                    |
| Largest diff. peak<br>and hole                         | 0.406 and -0.310 e.Å <sup>-3</sup>                                                                                       | 0.234 and -0.189 e.Å <sup>-3</sup>                                                                                    | 0.439 and -0.388 e.Å <sup>-3</sup>                                                                                                 |

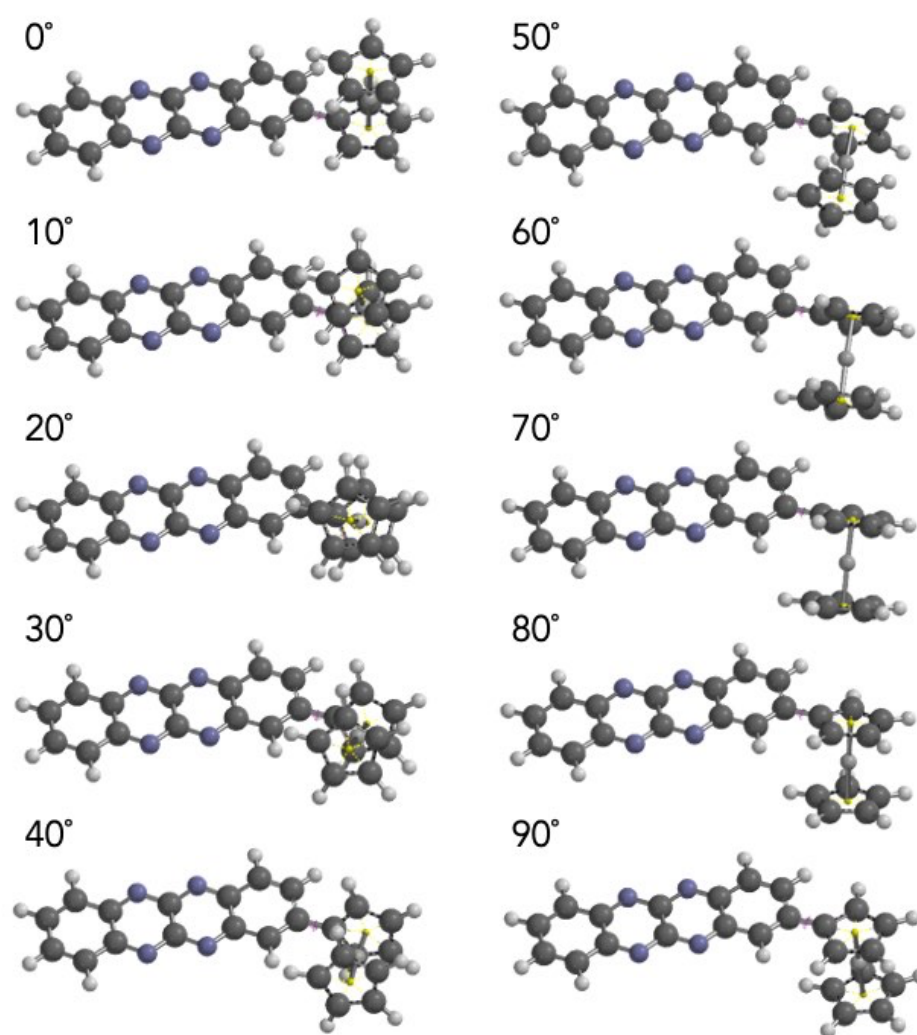

Figure S1. Molecular geometries optimized by DFT calculations at the B3LYP/6-31G\*\* at various torsion angles between Cp of Fc and TANC.

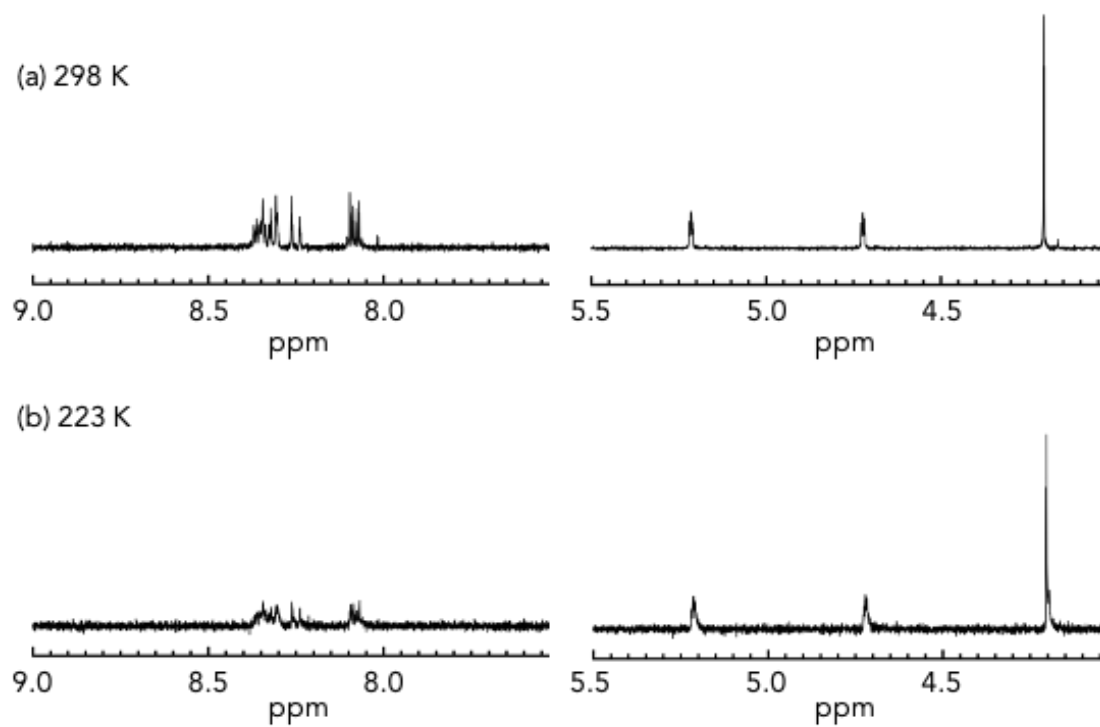

Figure S2.  $^1\text{H}$  NMR spectra of **FcTANC** in acetone- $d_6$  solutions at (a) 298 K and (b) 223 K.

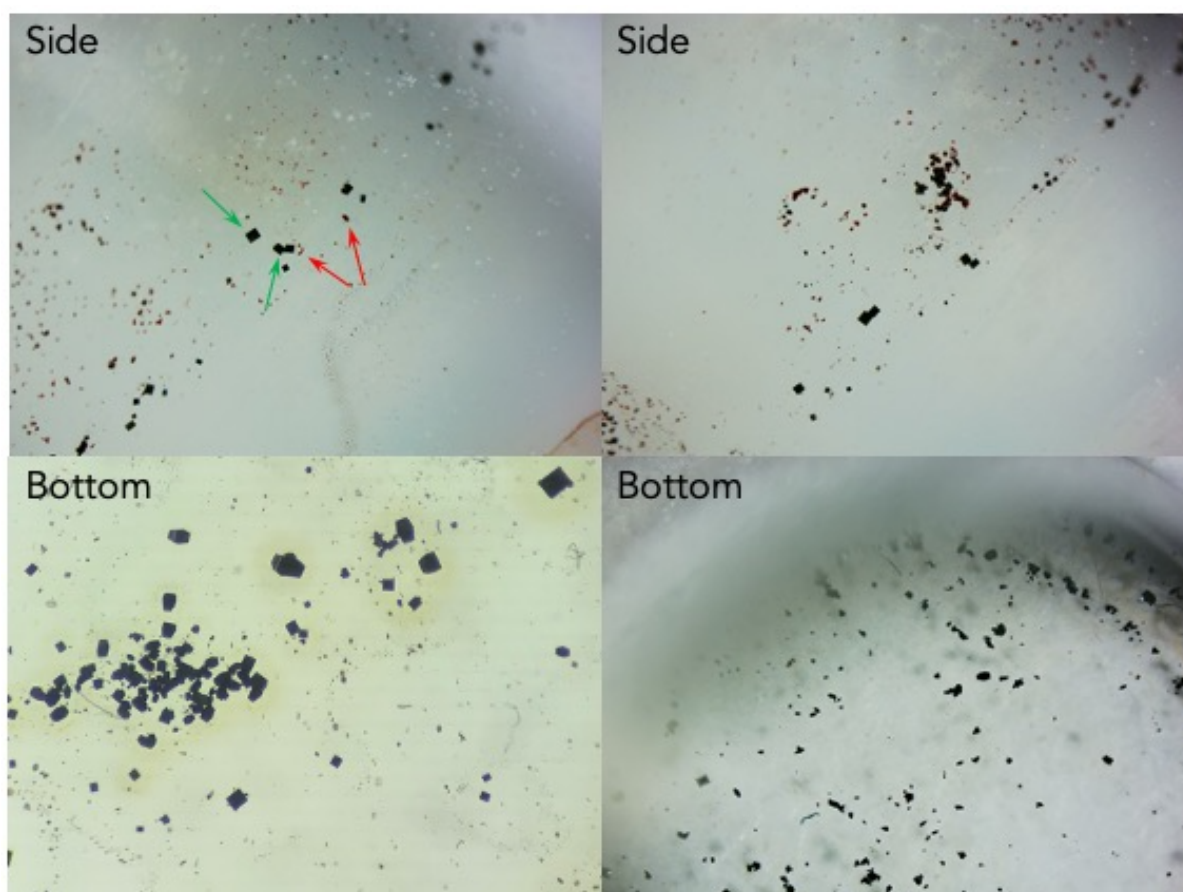

Figure S3. Photographs of Crystal I and Crystal II in glass vials. Red arrows indicate red crystals and green ones indicate green crystals.

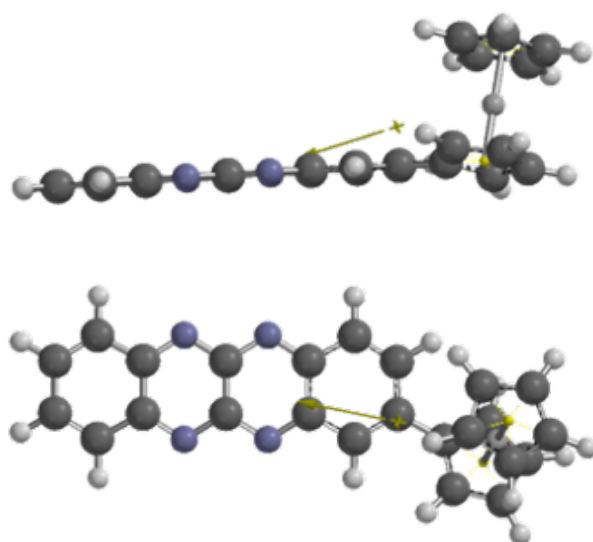

Figure S4. Dipole moment (1.98 debye) of **FcTANC** estimated by DFT calculation at the B3LYP/6-31G\*\*. Arrows indicate the dipole moment.

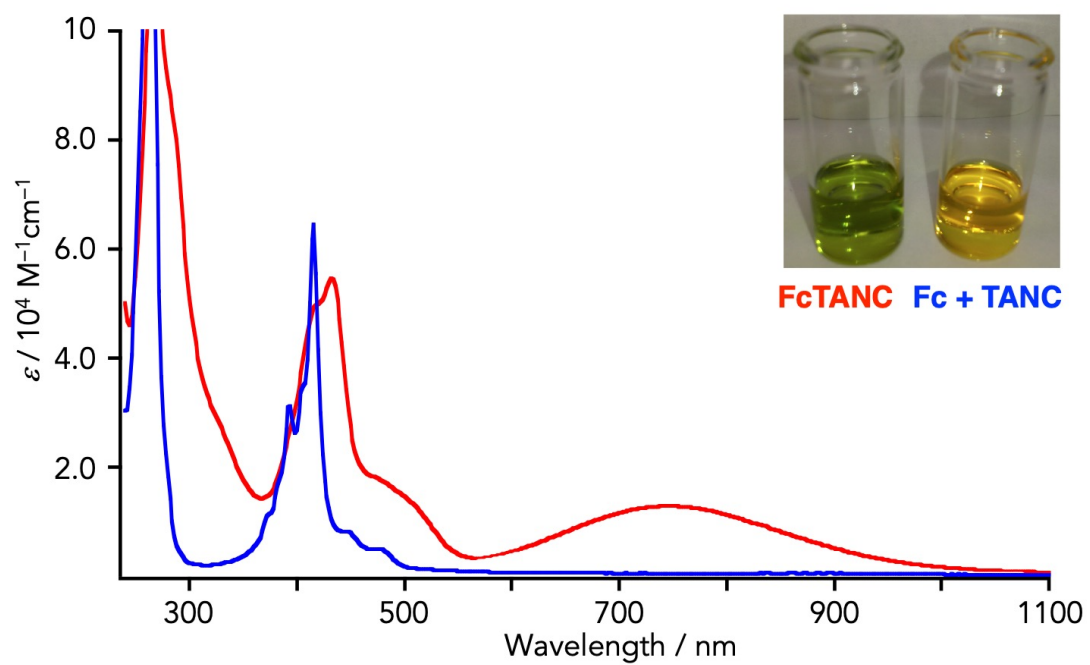

Figure S5. UV-vis absorption spectra of **FcTANC** (red line) and 1:1 mixture (mol) of **Fc** and **TANC** (blue line) in  $\text{CHCl}_3$  ( $10^{-5} \text{ M}$ ) and photographs.

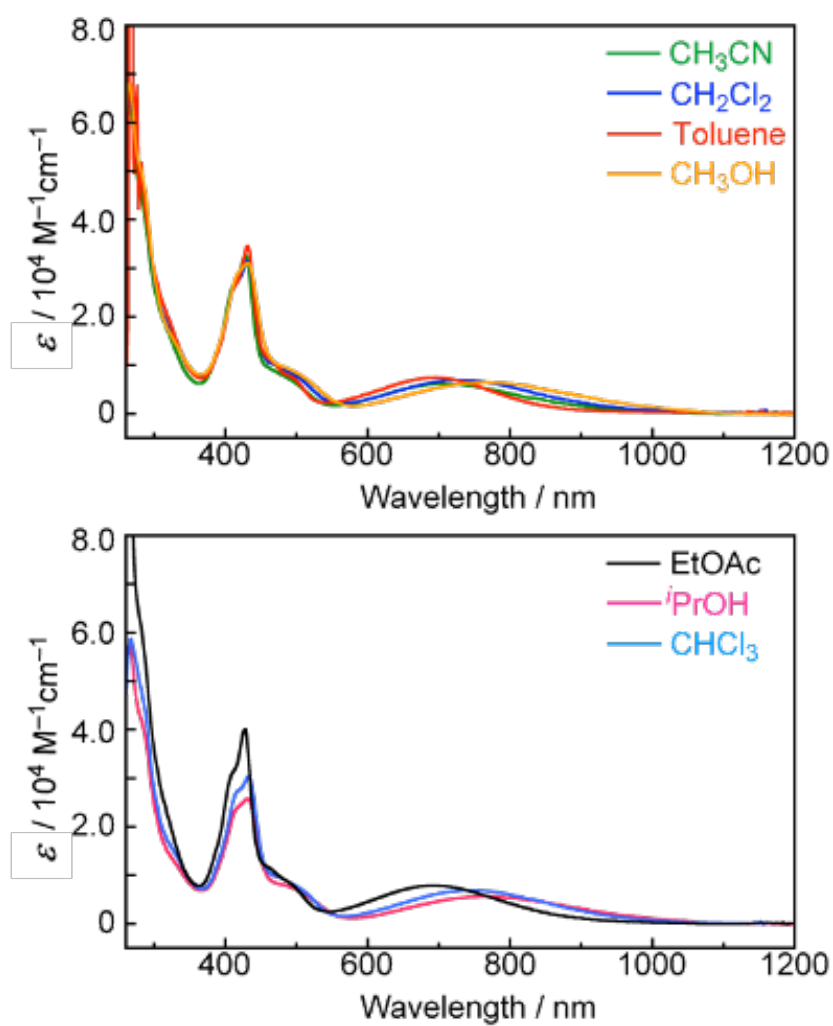

Figure S6. UV-*vis*-NIR spectra of **FcTANC** ( $10^{-5}$  M) in various solution states.

Table S2. Relationship between electronic properties of **FcTANC** and parameters of organic solvents.

|                                 | Protic/aprotic | MLCT |                  | Kamlet-Taft <sup>a</sup> |         |         | Gutmann <sup>b</sup> |      | Swain <sup>c</sup> |    | Kosower <sup>d</sup> |                     | $\mathcal{E}^f$ |
|---------------------------------|----------------|------|------------------|--------------------------|---------|---------|----------------------|------|--------------------|----|----------------------|---------------------|-----------------|
|                                 |                | nm   | cm <sup>-1</sup> | $\alpha$                 | $\beta$ | $\pi^*$ | DN                   | AN   | A                  | B  | Z                    | Dipole <sup>e</sup> |                 |
| Toluene                         | Aprotic        | 696  | 14368            | 00                       | 11      | 54      | 1.0                  |      | 13                 | 54 | -                    | 0.36                | 2.4             |
| EtOAc                           | Aprotic        | 696  | 14368            | 00                       | 45      | 55      | 17.1                 | 9.3  | 21                 | 59 | 64.0                 | 1.88                | 6.0             |
| CH <sub>3</sub> CN              | Aprotic        | 710  | 14085            | 19                       | 40      | 75      | 14.1                 | 18.9 | 37                 | 86 | 71.3                 | 3.92                | 37              |
| CH <sub>2</sub> Cl <sub>2</sub> | Aprotic        | 728  | 13736            | 13                       | 10      | 82      | 1.0                  | 20.4 | 33                 | 80 | 64.7                 | 1.60                | 9.1             |
| CHCl <sub>3</sub>               | Aprotic        | 746  | 13405            | 20                       | 10      | 58      | 40                   | 23.1 | 42                 | 73 | 63.2                 | 1.04                | 4.8             |
| CH <sub>3</sub> OH              | Protic         | 766  | 13055            | 98                       | 66      | 60      | 30.0                 | 41.3 | 75                 | 50 | 83.6                 | 1.70                | 33              |
| <sup>t</sup> PrOH               | Protic         | 770  | 12987            | 84                       | 90      | 52      | -                    | 37.3 | 63                 | 44 | 78.3                 | 1.66                | 18              |

<sup>a</sup> Hydrogen bonding donation  $\alpha$ ; Hydrogen bonding acceptance  $\beta$ ; Polarity/polarizability  $\pi^*$

<sup>b</sup> Donor Number *DN*; Acceptor Number *AN*

<sup>c</sup> Swain's Acity *A*; Swain's Basity *B*;

<sup>d</sup> Kosower's *Z*

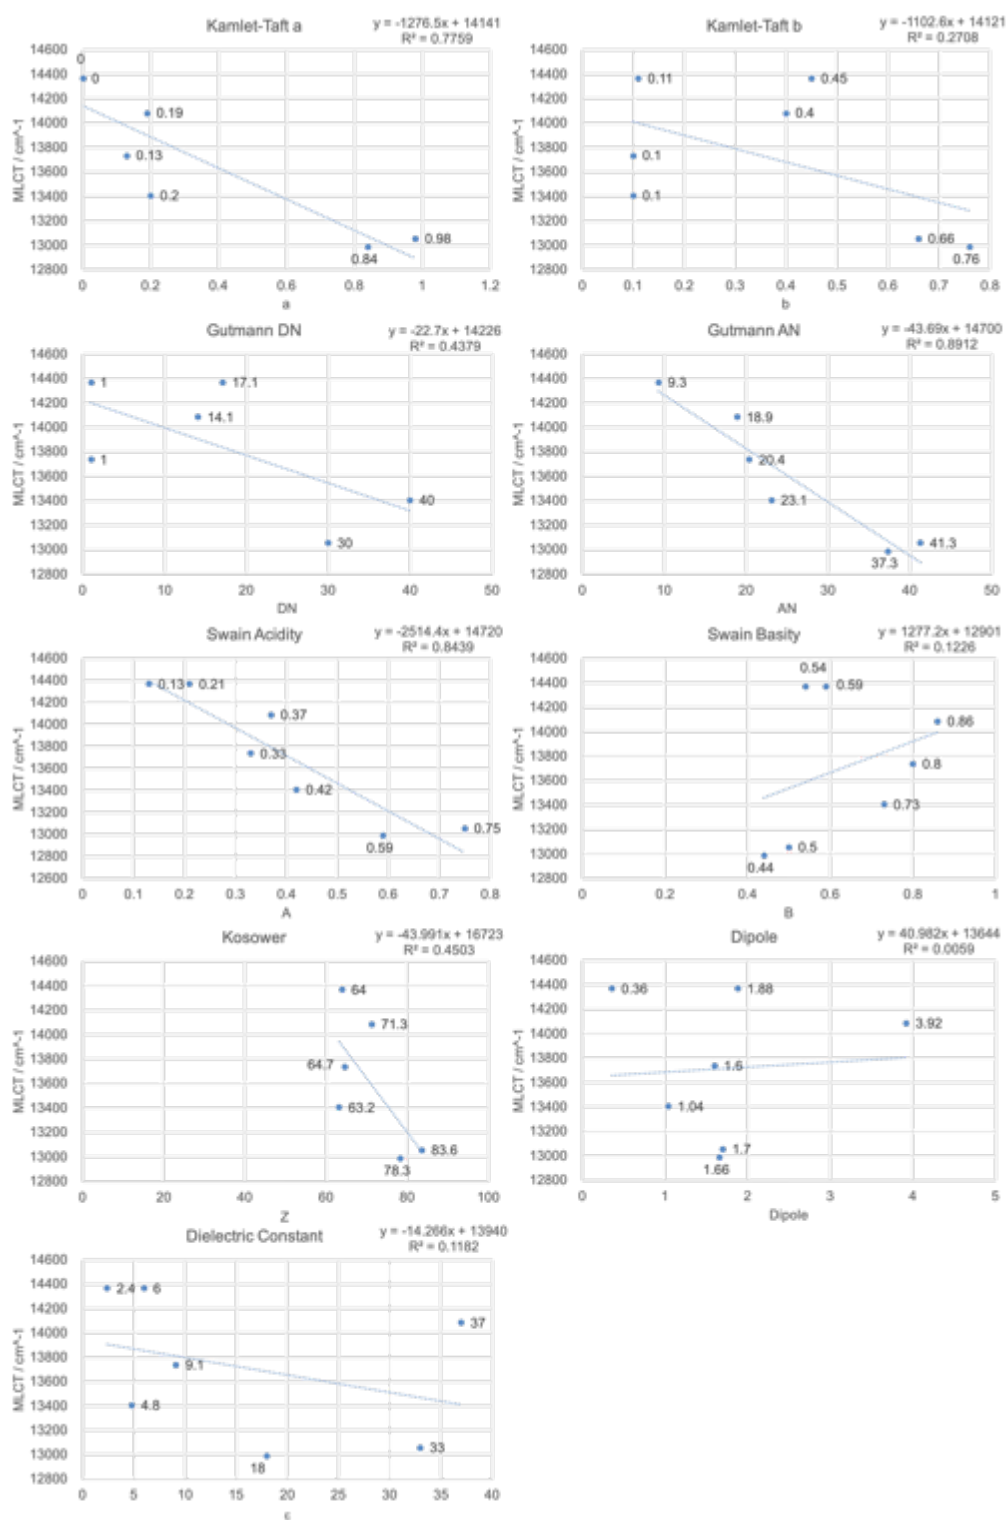

Figure S7. Single-parameter correlations between energy of MLCT band for **FcTANC** and different solvent parameters.

Table S3. Comparison of HOMO, LUMO, and  $E_{\text{gap}}$  for **FcTANC**, TANC and Fc.

|                     | HOMO / eV | LUMO / eV | $E_{\text{gap}}$ / eV |
|---------------------|-----------|-----------|-----------------------|
| FcTANC <sup>a</sup> | -4.95     | -3.97     | -0.98                 |
| TANC <sup>b</sup>   | -         | -4.00     | 2.90 <sup>c</sup>     |
| Fc                  | -4.80     | -         | -                     |

<sup>a</sup> Calculated by CV measurements.

<sup>b</sup> Referred from 5

<sup>c</sup> Estimated from the onset position of the UV-vis absorption spectrum in CH<sub>2</sub>Cl<sub>2</sub>:  $E_{\text{g}}^{\text{opt}} = 1240/\lambda_{\text{onset}}$ .

## References

1. (a) C. Lee, W. Yang and R. G. Parr, *Phys. Rev. B*, **1988**, 37, 785-789; b) P. C. Hariharan and J. A. Pople, *Chem. Phys. Lett.*, **1972**, 16, 217-219; c) P. C. Hariharan and J. A. Pople, *Theor. Chim. Acta*, **1973**, 28, 213-222.
2. G. M. Sheldrick, *Program for the Solution of Crystal Structures*, Univ. of Gottingen, Germany, **1997**.
3. G. M. Sheldrick, *Acta Cryst.*, **2015**, A71, 3-8.
4. G. M. Sheldrick, *Acta Cryst.*, **2015**, C71, 3-8.
5. K. Isoda, M. Nakamura, T. Tatenuma, H. Ogata, T. Sugaya, M. Tadokoro, *Chem. Lett.*, **2012**, 41, 937-939.
